# Supplementary material
Source: PubMed Central journal article supplement (PMC3761558)
Supplement: Supp_Figure1.pdf [file Supp_Figure1.pdf]

## Supplementary Data

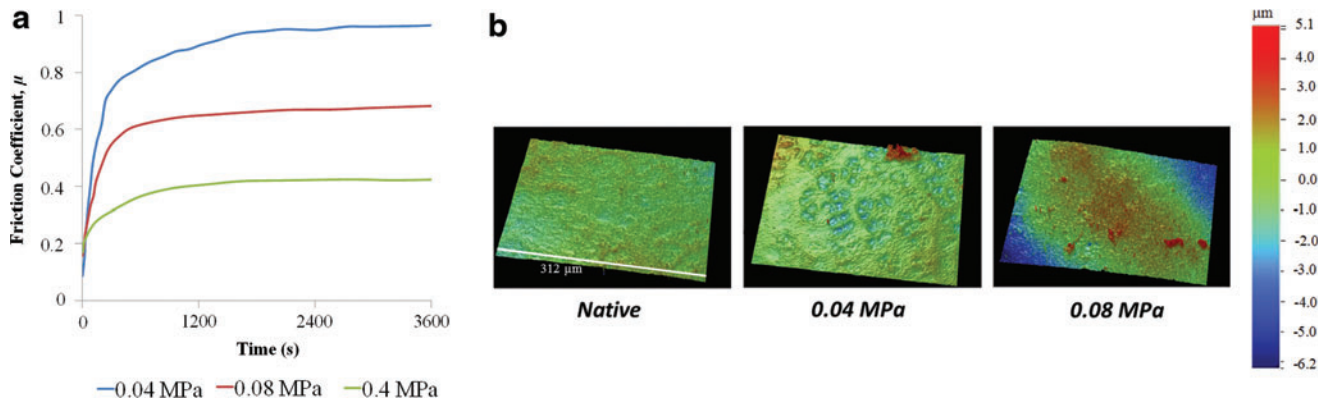

**SUPPLEMENTARY FIG. S1.** (a) Representative frictional response of articular cartilage at different contact pressures and (b) white light interferometry images of articular cartilage before and after shear loading.
